# Supplementary material
Source: PubMed Central journal article supplement (PMC4645417)
Supplement: IAI.01074-15_zii999091496so1.pdf [file IAI.01074-15_zii999091496so1.pdf]

**Supplemental Table 1. Sequences of template and sequencing primers for *fnbA*.**

| <b>Primer direction<br/>and identifier</b> | <b>Sequence</b>                       |
|--------------------------------------------|---------------------------------------|
| <b>Forward</b>                             |                                       |
| <i>fnbA</i> -F                             | 5'-CCGAACAATATAGACTTGCATTTATTAAG-3'   |
| <i>fnbA</i> -F1                            | 5'-GAACACAAATGGTAGGACATCCAGAGCAAC-3'  |
| <i>fnbA</i> -F2                            | 5'-CAATAGAAGAAACGGATTCATCAGCTATTG-3'  |
| <i>fnbA</i> -F3                            | 5'-CTGGTTTAGGAACTGAAAATGGTCACG-3'     |
| <i>fnbA</i> -F4                            | 5'-CAGTCATTTCGAGGAAGATACAGAAAAAGAC-3' |
| <b>Reverse</b>                             |                                       |
| <i>fnbA</i> -R                             | 5'-CATCAGACATAAACCAATGAAGCAATCAG-3'   |
| <i>fnbA</i> -R1                            | 5'-CTTCATATTCAACAACATCAGCGTGATG-3'    |
| <i>fnbA</i> -R2                            | 5'-CCCGTGACCATTTTCAGTTCCTAAACC-3'     |
| <i>fnbA</i> -R3                            | 5'-GTTGTATCTTCAATCGTTTGTTGACCTTC-3'   |
| <i>fnbA</i> -R4                            | 5'-CTTTACCTTGTTCCACTGGTTTAGAAGG-3'    |

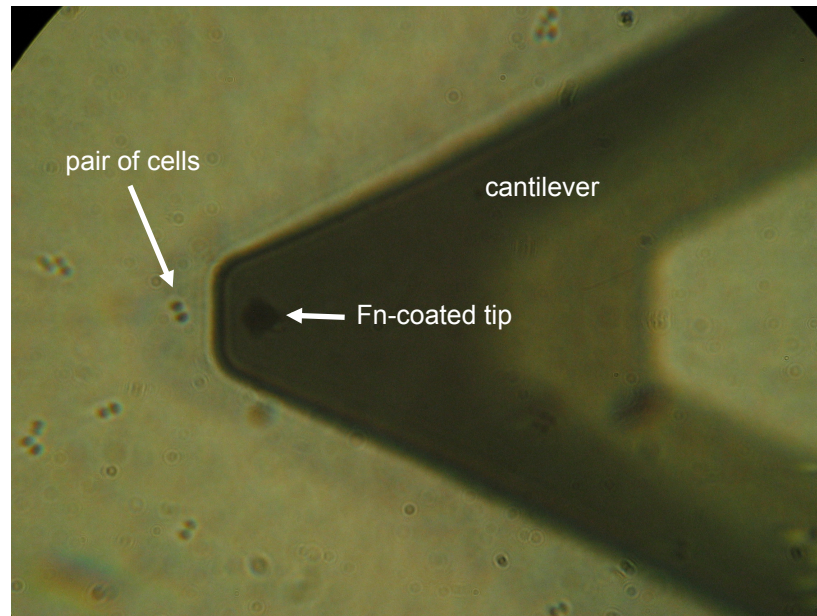

**Supplemental Figure 1. Optical microscope image of AFM experiment.**

Binary fission pair of *S. aureus* cells about to be probed with a fibronectin-coated tip, which is integrated into the end of the force-sensing cantilever. The cells are supported on a glass slide. The entire system is immersed in buffer.

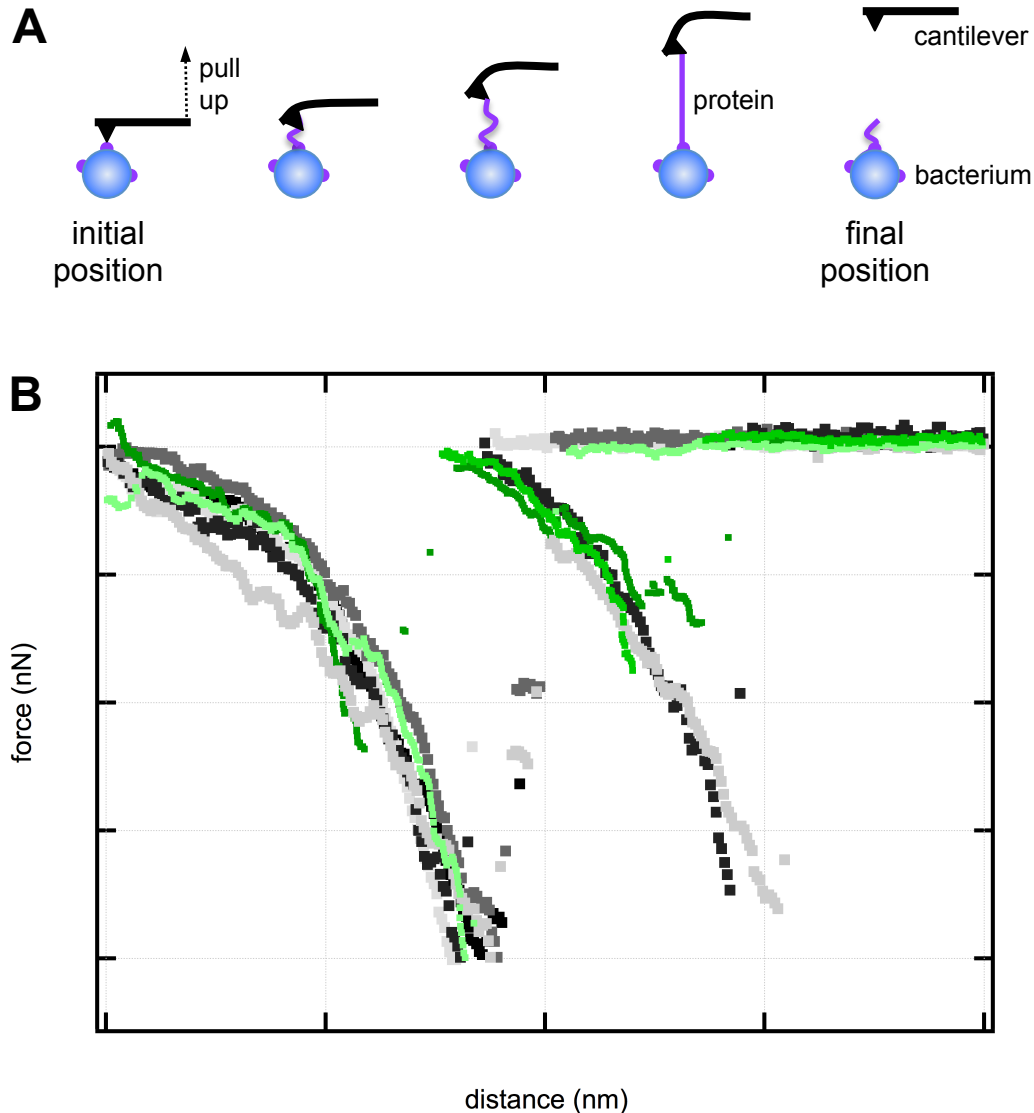

**Supplemental Figure 2. Control experiment using AFM on *Lactococcus lactis*.** (A) Schematic diagram (not to scale) showing a fibronectin-coated tip that was used to probe *L. lactis* strains engineered to express either *fnbA* or *fnbB* genes. Fibronectin on the tip was mechanically separated from FnBPs on a bacterium by pulling the cantilever away from the cell. Unraveling of a protein-protein complex resulted in a “sawtooth shaped” force spectrum. (B) Black- and gray-colored curves were obtained on *L. lactis* expressing FnBPA or FnBPB on their outer cell wall. Green-colored curves are some of the spectra obtained on the CC5 and CC45 clinical isolates of *S. aureus* as described in the manuscript. These spectra are not offset vertically (as is the case for Figure 1 in the manuscript) to highlight the overlapping similarities in the curves for *L. lactis* and *S. aureus*. Native *L. lactis* is an ideal control specimen because it is Gram-positive like *S. aureus*, but it does not naturally bind to fibronectin and lacks *fnbA* and *fnbB* genes.

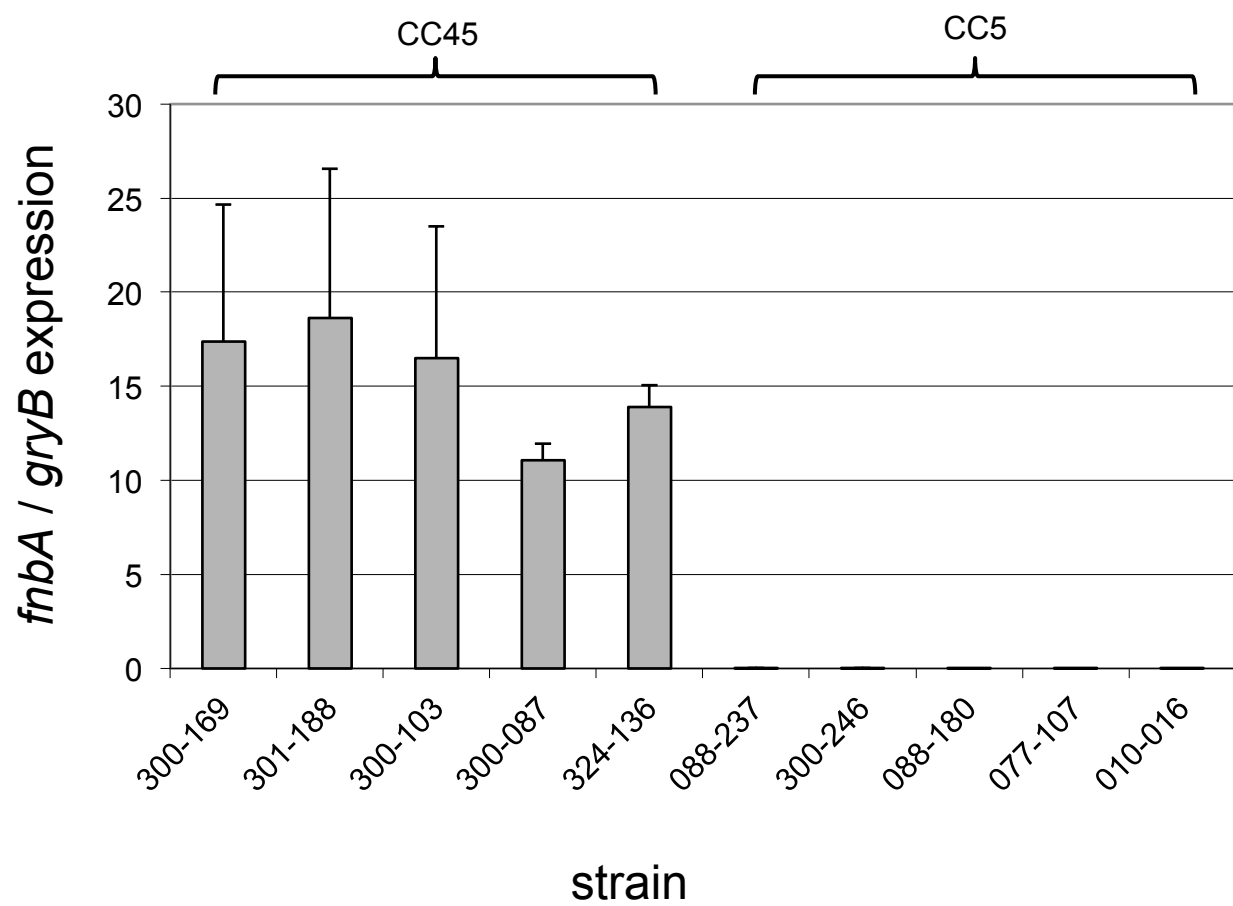

**Supplemental Figure 3. qRT-PCR of *fnbA* at 3 hour post-inoculation.** The effect of clonal variation on *fnbA* transcription by qRT-PCR, normalized by *gryB*, at 3 h post-inoculation.

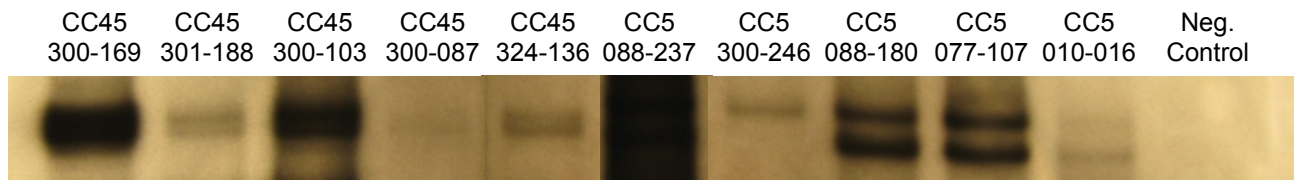

**Supplemental Figure 4. Western blots of fibronectin binding proteins.** Western blot showing protein bands for FnBPs in the ten *S. aureus* isolates arranged from left to right in the same order as the RT-PCR data. A negative control was also performed with *S. aureus* DU5883, a double mutant that cannot express *fnbA* and *fnbB*.

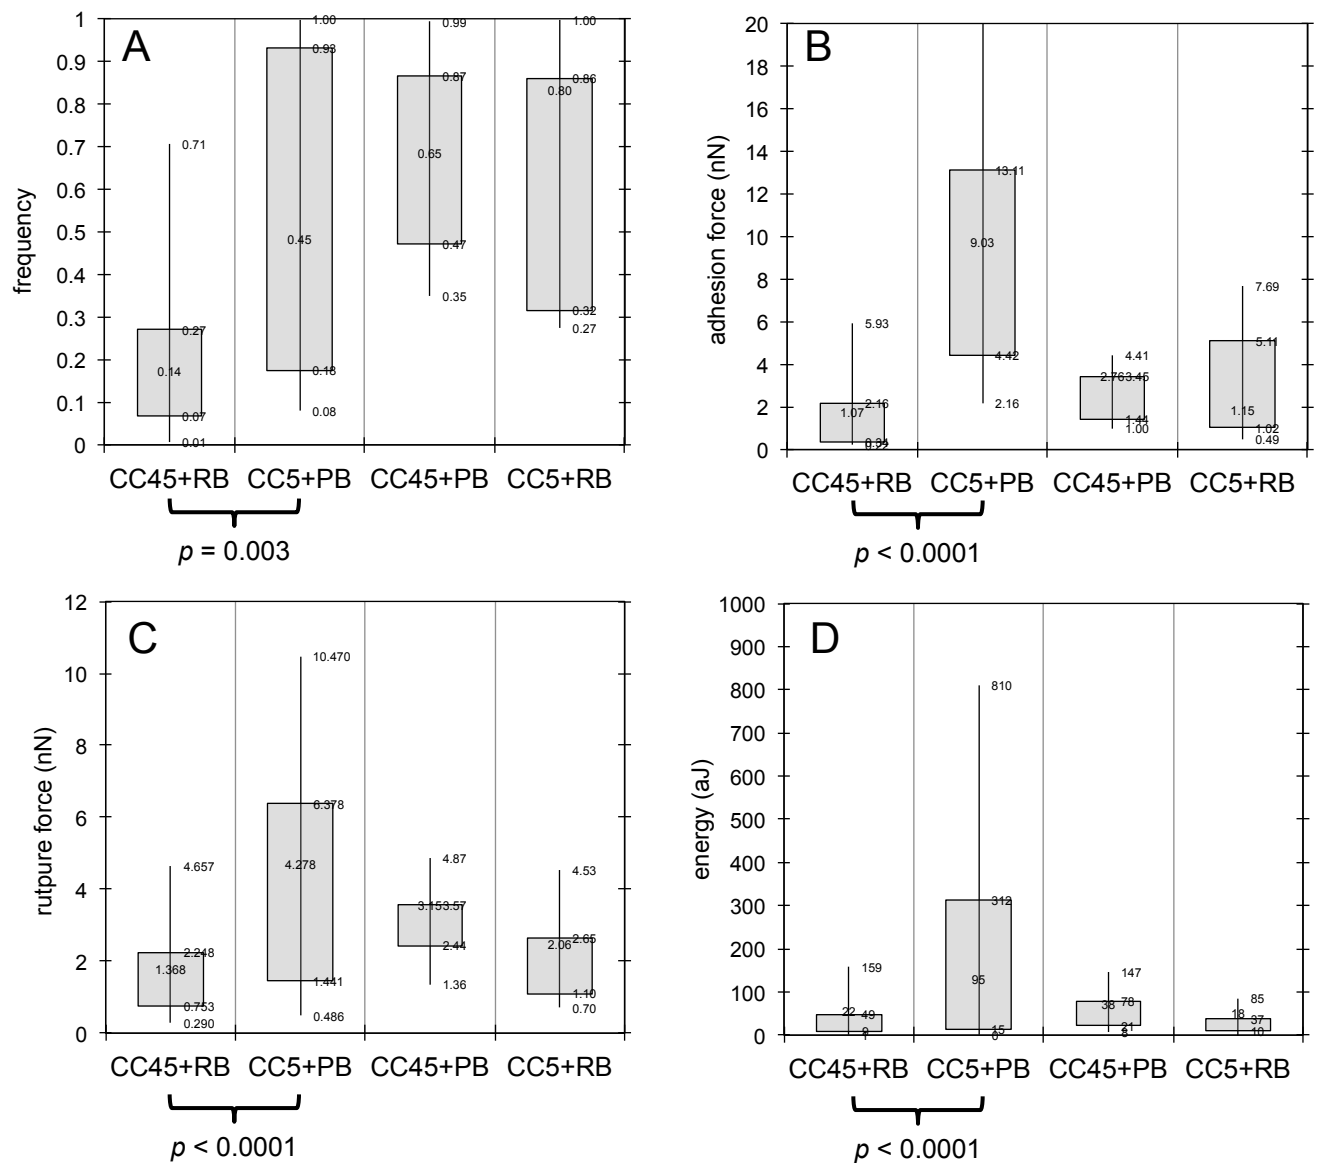

**Supplemental Figure 5. AFM binding metrics for a fibronectin-coated probe on *S. aureus* grouped by both clonotype and persistence of infection.** Box and whisker plots of (A) frequency of binding, (B) adhesion force, (C) rupture force, and (D) energy (or work) of binding for a fibronectin-coated probe on *S. aureus* grouped as CC45+RB versus CC5+PB. CC corresponds to the clonal complex, RB indicates resolving bacteremia and PB is persistent bacteremia. Force is in nanoNewtons ( $10^{-9}$  N) and energy/work is in attoJoules ( $10^{-18}$  J). Box ends represent the first and third quartiles. Whisker ends represent the 9<sup>th</sup> and 91<sup>st</sup> percentile.
